# Supplementary material for: Veratri Nigri Rhizoma et Radix (Veratrum nigrum L.) and Its Constituent Jervine Prevent Adipogenesis via Activation of the LKB1‐AMPKα‐ACC Axis In Vivo and In Vitro
Source: Hindawi journal article supplement (doi:10.1155/2016/8674397), 2016-01-01
Supplement: f1 [file 8674397.f1.pdf]

## SUPPLEMENTARY INFORMATION

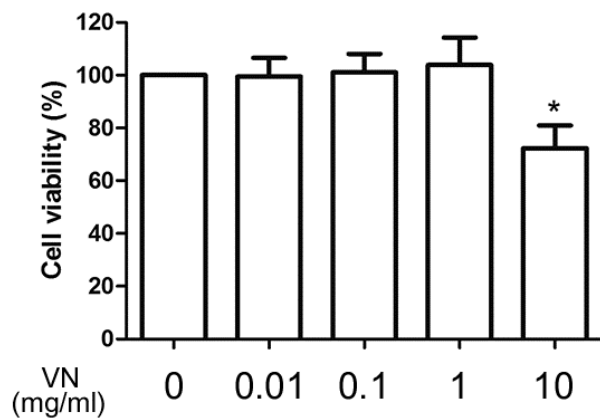

(a)

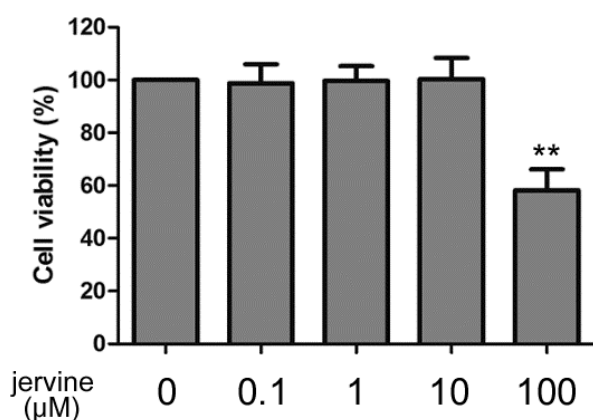

(b)

SUPPLEMENTARY FIGURE S1: Cell viability tests of VN and jervine in 3T3-L1 preadipocytes. 3T3-L1 preadipocytes were treated with various concentrations of (a) VN (0.01 – 1 mg/ml) or (b) jervine (0.1 – 10 μM) for 48h, and then the cell viability was determined by an MTS assay. Data are expressed as mean  $\pm$  S.D. of three or more experiments. \*  $p < 0.05$ , \*\*  $p < 0.01$  vs. non-treated preadipocytes.

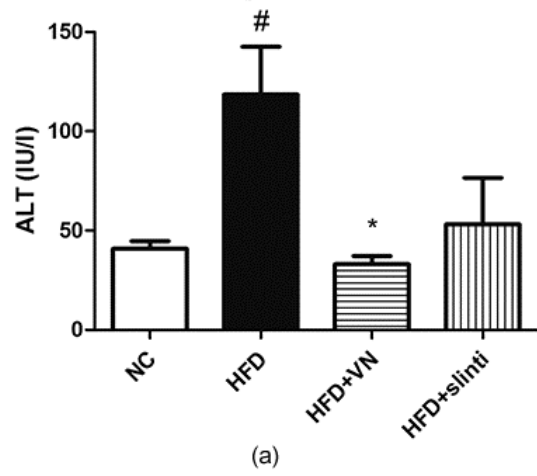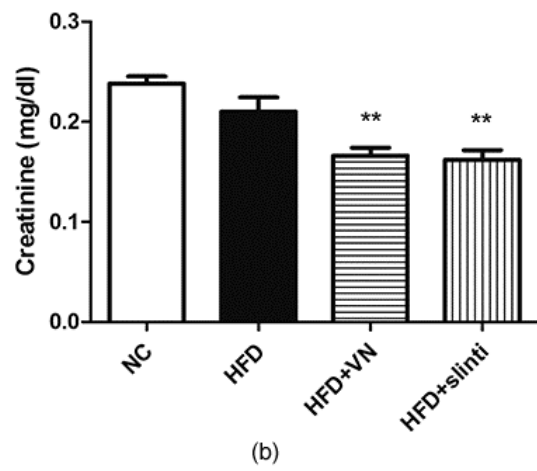

SUPPLEMENTARY FIGURE S2: Serum analysis of HFD-induced obese mice. Serum levels of (a) alanine aminotransferase (ALT) and (b) creatinine were measured. Data are expressed as mean  $\pm$  S.D. (n = 5 – 7). <sup>#</sup> $p < 0.05$  vs. NC group, <sup>\*</sup> $p < 0.05$  vs. HFD-induced obese group.

SUPPLEMENTARY TABLE S1: Composition of experimental diets (g/kg).

| <b>Consistents</b>             | <b>Con</b> | <b>HFD*</b> | <b>VN*</b> | <b>Slinti*</b> |
|--------------------------------|------------|-------------|------------|----------------|
| Casein                         | 200.0      | 265.0       | 265.0      | 265.0          |
| L-Cystine                      | 3.0        | 4.0         | 4.0        | 4.0            |
| Corn Starch                    | 397.486    | -           | -          | -              |
| Maltodextrin                   | 132.0      | 160.0       | 160.0      | 160.0          |
| Sucrose                        | 100.0      | 90.0        | 90.0       | 90.0           |
| Lard                           | -          | 310.0       | 310.0      | 310.0          |
| Soybean Oil                    | 70.0       | 30.0        | 30.0       | 30.0           |
| Cellulose                      | 50.0       | 65.5        | 65.5       | 65.5           |
| Mineral Mix <sup>a</sup>       | 35.0       | 48.0        | 48.0       | 48.0           |
| Calcium Phosphate, dibasic     | -          | 3.4         | 3.4        | 3.4            |
| Vitamin Mix <sup>b</sup>       | 10.0       | 21.0        | 21.0       | 21.0           |
| Choline Bitartrate             | 2.5        | 3.0         | 3.0        | 3.0            |
| TBHQ, antioxidant <sup>c</sup> | 0.014      | -           | -          | -              |
| Blue Food Color                | -          | 0.1         | 0.1        | 0.1            |
| <i>Veratrum nigrum</i>         | -          | -           | 0.75       | -              |
| Slinti                         | -          | -           | -          | 0.75           |

<sup>a</sup>Mineral Mix, AIN-93G-MX (94046) containing (g/kg): calcium phosphate dibasic 500, sodium chloride 74, potassium citrate 220, potassium sulfate 52, magnesium oxide 24, manganous carbonate 3.5, ferric citrate 6, zinc carbonate 1.6, cupric carbonate 0.3, potassium iodate 0.01, sodium selenite 0.01, chromium potassium sulfate 0.55

<sup>b</sup>Vitamin Mix, AIN-93-VX (94047) containing (g/kg): thiamin HCl 0.6, riboflavin 0.6, pyridoxine HCl 0.7, niacin 3, calcium pantothenate 1.6, folic acid 0.2, biotin 0.02, vitamin B12 (0.1 % trituration in mannitol) 1, dry vitamin A palmitate (500,00 U/g) 0.25, manadione sodium bisulfite complex 0.15

<sup>c</sup>TBHQ: tertiary butylhydroquinone

\*60 % of total calories come from fat.

SUPPLEMENTARY TABLE S2: Primer sequences used for Real-Time RT-PCR.

| Target gene                     | Primer sequences                                                                     |
|---------------------------------|--------------------------------------------------------------------------------------|
| <i>PPAR<math>\gamma</math></i>  | 5'-TTTCAAGGGTGCCAGTTTC-3' (sense)<br>5'-TTATTCATCAGGGAGGCCAG-3' (antisense)          |
| <i>C/EBP<math>\alpha</math></i> | 5'-GCCGAGATAAAGCCAAACAA-3' (sense)<br>5'-CGTAAATGGGGATTTGGTCA-3' (antisense)         |
| <i>LIPIN1</i>                   | 5'-TTCCTTGTCCCTGAACTGCT-3' (sense)<br>5'-TGAAGACTCGCTGTGAATGG-3' (antisense)         |
| <i>aP2</i>                      | 5'-CGTAAATGGGGATTTGGTCA-3' (sense)<br>5'-TCGACTTTCCATCCCCTTC-3' (antisense)          |
| <i>SIRT1</i>                    | 5'-AGTTCCAGCCGTCTCTGTGT-3' (sense)<br>5'-GATCCTTTGGATTCCTGCAA-3' (antisense)         |
| <i>resistin</i>                 | 5'-TTCCTTGTCCCTGAACTGCT-3' (sense)<br>5'-AGCTCAAGACTGCTGTGCCT-3' (antisense)         |
| <i>adiponectin</i>              | 5'-AGACCTGGCCACTTTCTCCTCATT-3' (sense)<br>5'-AGAGGAACAGGAGAGCTTGCAACA-3' (antisense) |
| <i>GAPDH</i>                    | 5'-AACTTTGGCATTGTGGAAGG-3' (sense)<br>5'-GGATGCAGGGATGATGTTCT-3' (antisense)         |
